# Supplementary material for: Kinetics and mechanism of metal–organic framework thin film growth: systematic investigation of HKUST-1 deposition on QCM electrodes
Source: Royal Society of Chemistry journal article supplement (doi:10.1039/c2sc20065a), 2012-01-01
Supplement: c2sc20065a.pdf [file c2sc20065a.pdf]

# Kinetics and mechanism of metal-organic framework thin film growth: Systematic investigation of HKUST-1 deposition on QCM electrodes

Vitalie Stavila,<sup>1\*</sup> Joanne Volponi,<sup>1</sup> Aaron M. Katzenmeyer,<sup>1</sup> Matthew C. Dixon,<sup>2</sup> Mark D. Allendorf<sup>1\*</sup>

<sup>1</sup> Sandia National Laboratories, Livermore, CA, 94551

<sup>2</sup> Biolin Scientific, Inc., Linthicum Heights, MD, 21090

---

## **SUPPLEMENTARY INFORMATION**

|                                                                                                                                                                                  |   |
|----------------------------------------------------------------------------------------------------------------------------------------------------------------------------------|---|
| Experimental Methods .....                                                                                                                                                       | 2 |
| Figure S1. A schematic representation of the QCM experimental setup .....                                                                                                        | 3 |
| Figure S2. EDS data on the Cu <sub>3</sub> (btc) <sub>2</sub> @SiO <sub>2</sub> film after five cycles of growth .....                                                           | 4 |
| Figure S3. RAIR spectroscopy on the Cu <sub>3</sub> (btc) <sub>2</sub> @QCM coatings .....                                                                                       | 5 |
| Figure S4. AFM roughness analysis of the Cu <sub>3</sub> (btc) <sub>2</sub> @SiO <sub>2</sub> and Cu <sub>3</sub> (btc) <sub>2</sub> @Al <sub>2</sub> O <sub>3</sub> films ..... | 6 |
| Figure S5. A representative interferometry scan on a large area of the Cu <sub>3</sub> (btc) <sub>2</sub> @SiO <sub>2</sub> film .....                                           | 7 |

\* To whom correspondence should be addressed:

Vitalie Stavila, [vnstavi@sandia.gov](mailto:vnstavi@sandia.gov); Mark D. Allendorf, [mdallen@sandia.gov](mailto:mdallen@sandia.gov).

## Experimental Methods

**Materials.** All starting reagents were reagent grade and obtained from commercial sources. HPLC-grade ethanol was used to prepare copper(II) acetate and trimesic acid solutions.

**Preparation of Self-Assembled Monolayers (SAMs) on gold.** The QCM electrode surfaces were cleaned using oxygen plasma treatment (Micro RIE, Series 800 Plasma System). The Au-coated QCM crystals were kept for 24 hours in a 1.0 M ethanolic solution of 11-mercaptopundecanoic acid (for COOH-functionalized SAMs) or 11-mercaptopundecanol (for OH-terminated SAMs) and rinsed with ethanol before used.

**Deposition of  $\text{Cu}_3(\text{btc})_2$  thin films on QCM crystals.** The  $\text{Cu}_3(\text{btc})_2$  thin films were grown on the surface of the QCM crystals by continuously flowing alternating ethanolic solutions of  $\text{Cu}(\text{OAc})_2$  and  $\text{H}_3\text{btc}$  over the surface for 5 minutes, with 10 minutes ethanol washing steps in between. The injection speed for the three solutions was maintained constant at 0.1 mL/min. 1.0 mM ethanolic solutions of trimesic acid and 0.2 mM solutions of copper(II) acetate were used as stock solutions. After the coating the QCM electrodes were washed with ethanol and dried in a nitrogen stream.

**Quartz Crystal Microbalance.** Two different Quartz Crystal Microbalances were used in this study: a Q-Sense E4 system (designated QCM-D below) equipped with 4 sensor flow modules (Q-Sense Inc.) and an SRS-200 QCM system with a single module. Both instruments have a fundamental resonance frequency of 5 MHz. The SRS system measures the changes in the first harmonic frequency and the change in resistance, while the QCM-D system runs in pulsed mode and can measure up to seven different harmonics and their corresponding dissipation factors. The isothermal conditions in the Q-Sense system are achieved using Peltier temperature control cells ( $\pm 0.02$  °C), while in the case of the SRS system a water bath is used ( $\pm 0.1$  °C). Temperature-dependent QCM measurements were performed on a LabView-controlled system equipped with peristaltic pumps (Figure S1). The electrodes were formed by evaporating gold onto both sides of AT-cut quartz crystals. The measurements were made in flow cells with one electrode in direct contact with the liquid phase.

**Characterization Details.** Reflection-absorption infrared (RAIR) measurements were recorded on a Perkin-Elmer FT-IR spectrometer. Scanning Electron Microscopy (SEM) and Energy Dispersive Spectroscopy studies were performed on a JEOL 6700 and a Hitachi S4500 electron microscope. Scanning white-light interferometry measurements were performed on a VEECO Instruments Inc. microscope. Atomic Force Microscopy (AFM) was performed using a Digital Instruments Dimension 3000 operating in tapping mode to collect height images. Grazing incidence X-ray diffraction (XRD) measurements were performed on a PANalytical Empyrean system equipped with a PIXcel<sup>3D</sup> detector using Cu K $\alpha$  radiation. The samples are placed at an appropriate angle to the source so that the X-rays exhibit grazing incidence with the surface and then the PIXcel detector is physically rotated through an angle of  $2\theta$  relative to the sample. The XRD pattern of the bulk HKUST-1 sample (Basolite C300, Sigma-Aldrich) was collected on the same Empyrean system using Bragg-Brentano geometry.

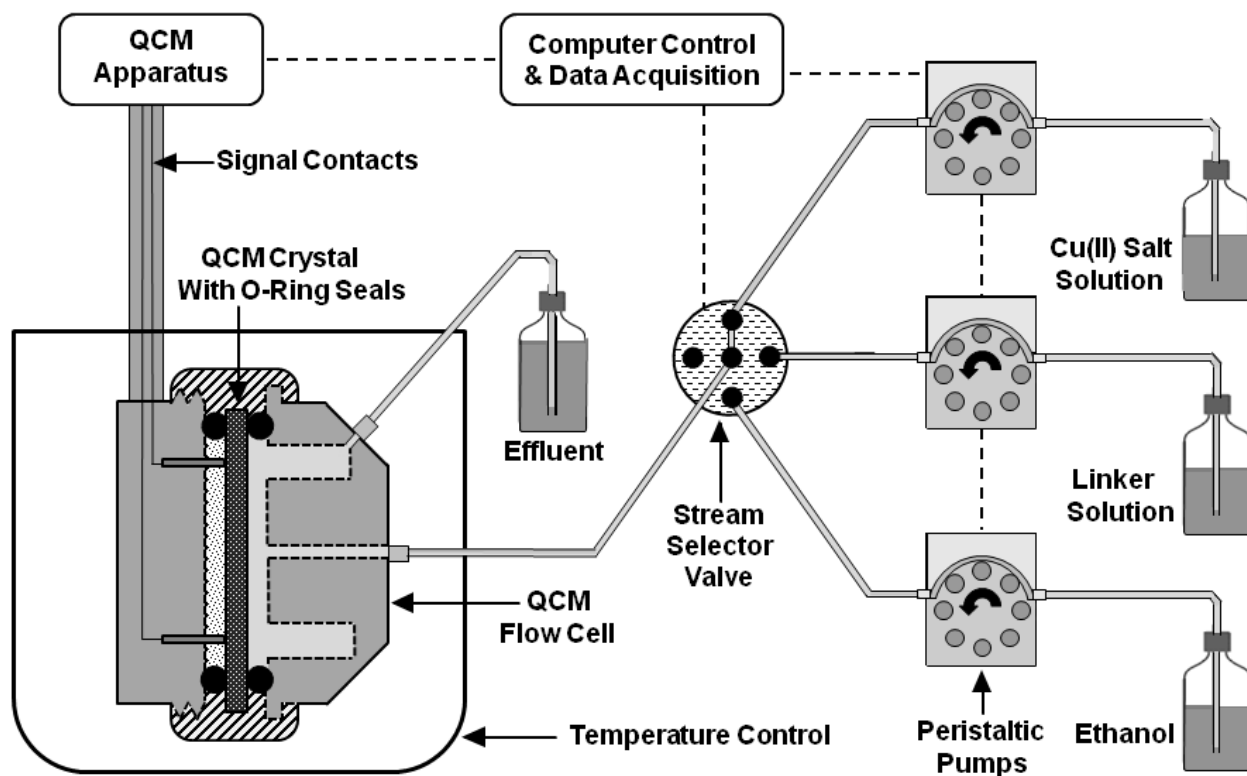

Figure S1. A schematic representation of the QCM experimental setup.

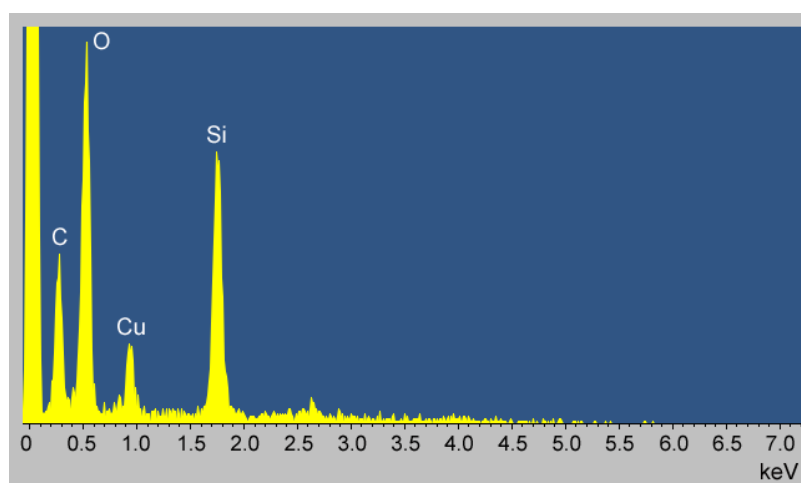

**Figure S2.** EDS of the  $\text{Cu}_3(\text{btc})_2@ \text{SiO}_2$  film obtained after five cycles of  $\text{Cu}_2(\text{OAc})_4 + \text{H}_3\text{btc}$  step-by-step deposition showing the presence of copper on the surface.

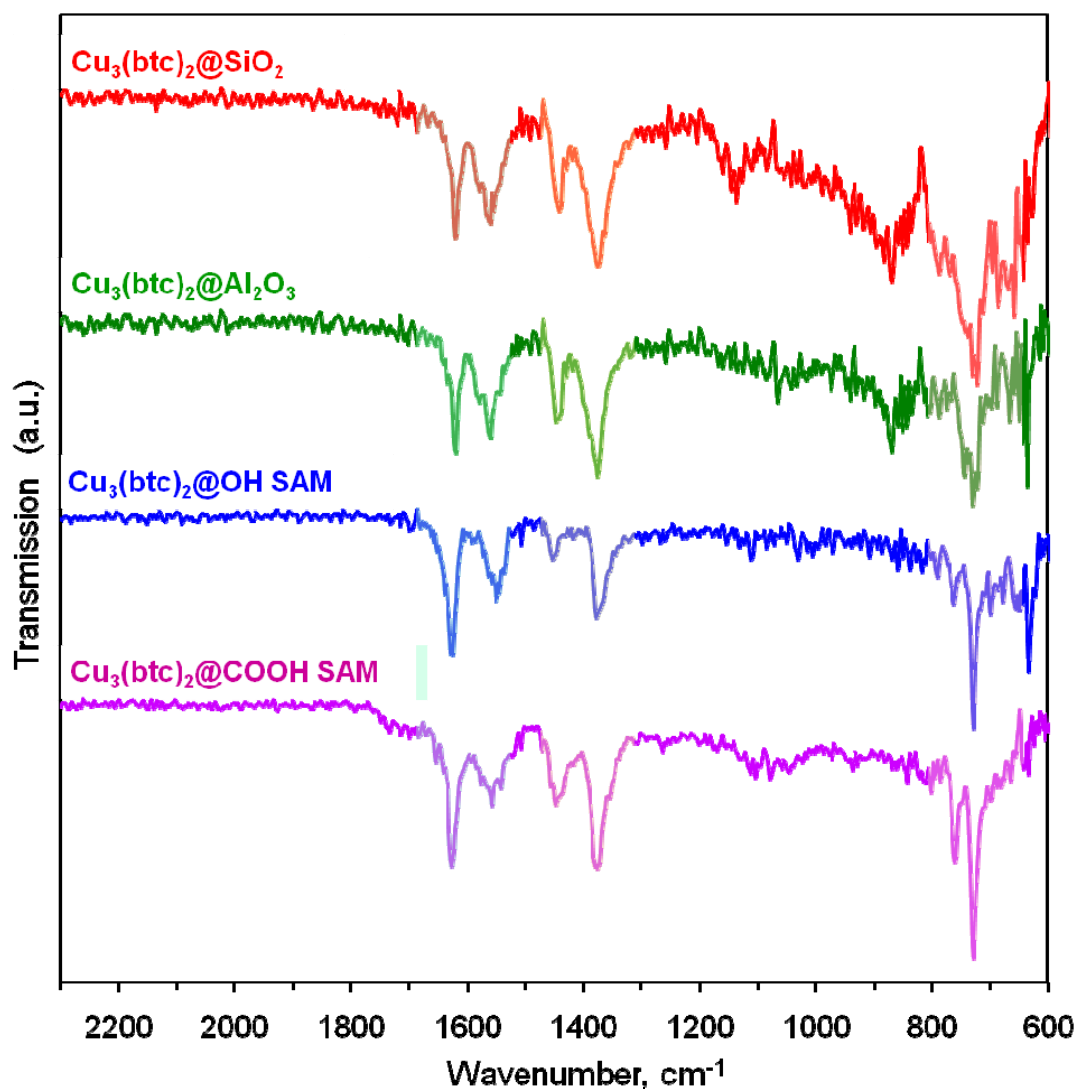

**Figure S3.** Reflection-Absorption Infrared (RAIR) spectra of Cu<sub>3</sub>(btc)<sub>2</sub> coatings on various QCM electrodes deposited for 20 cycles at 32 °C.

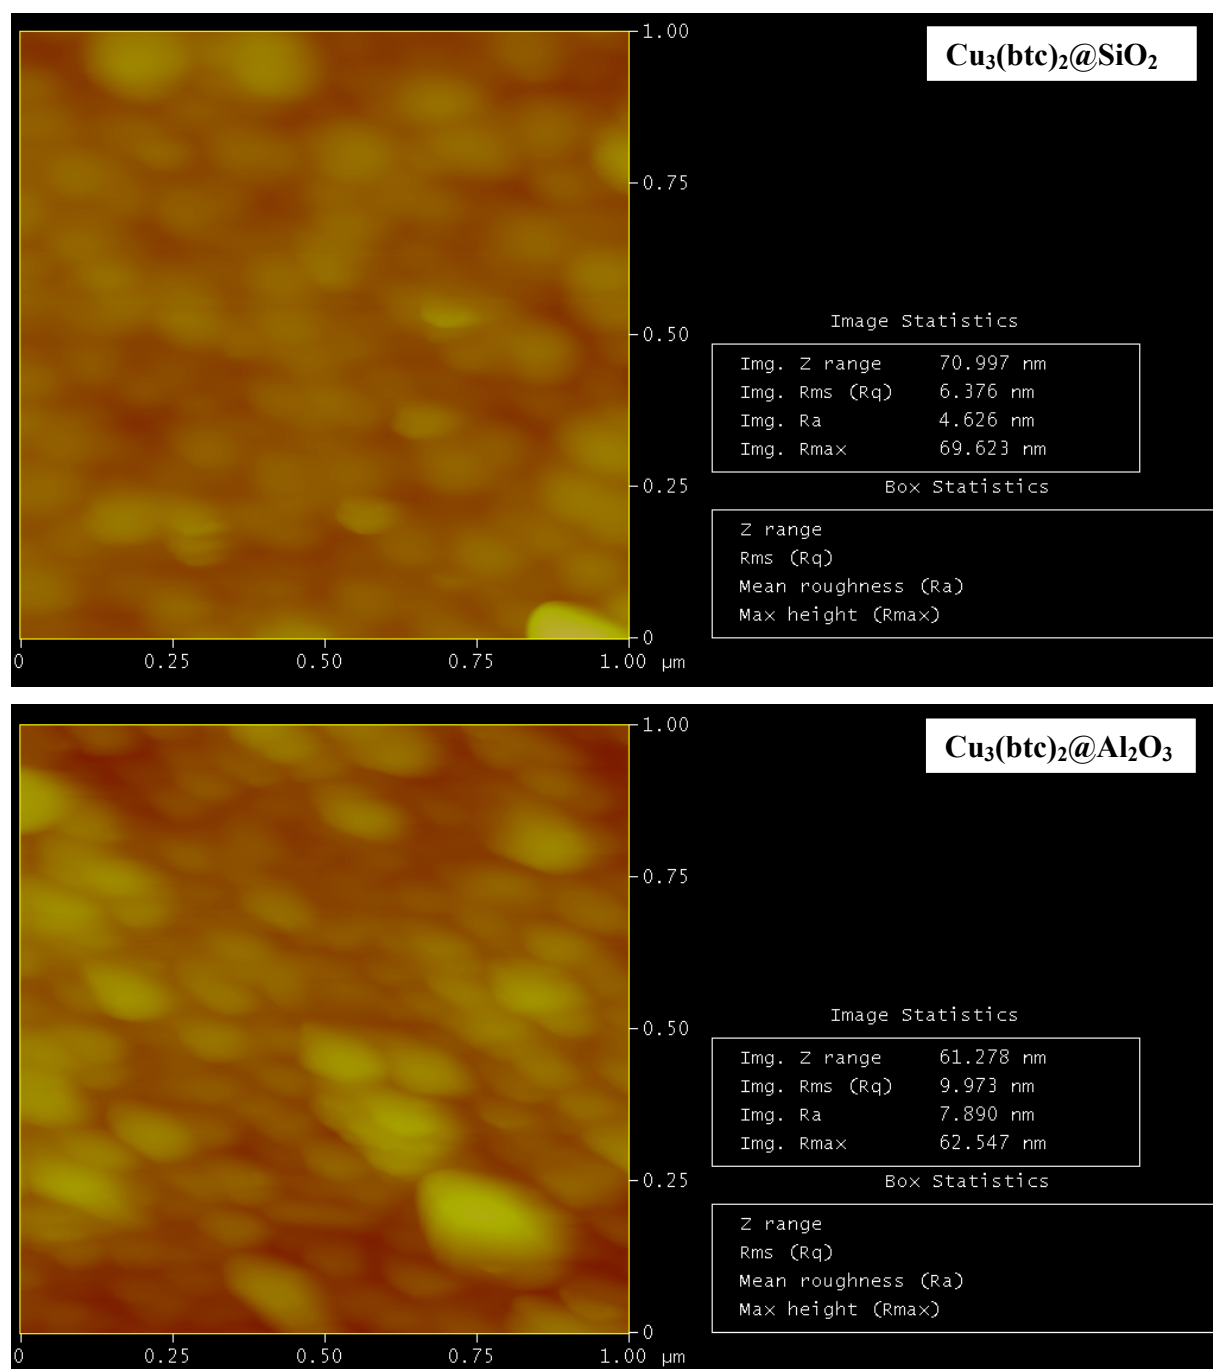

**Figure S4.** Comparison of root-mean-square (RMS) roughness between Cu<sub>3</sub>(btc)<sub>2</sub>@SiO<sub>2</sub> and Cu<sub>3</sub>(btc)<sub>2</sub>@Al<sub>2</sub>O<sub>3</sub> films grown on QCM electrodes for 20 cycles at 32 °C.

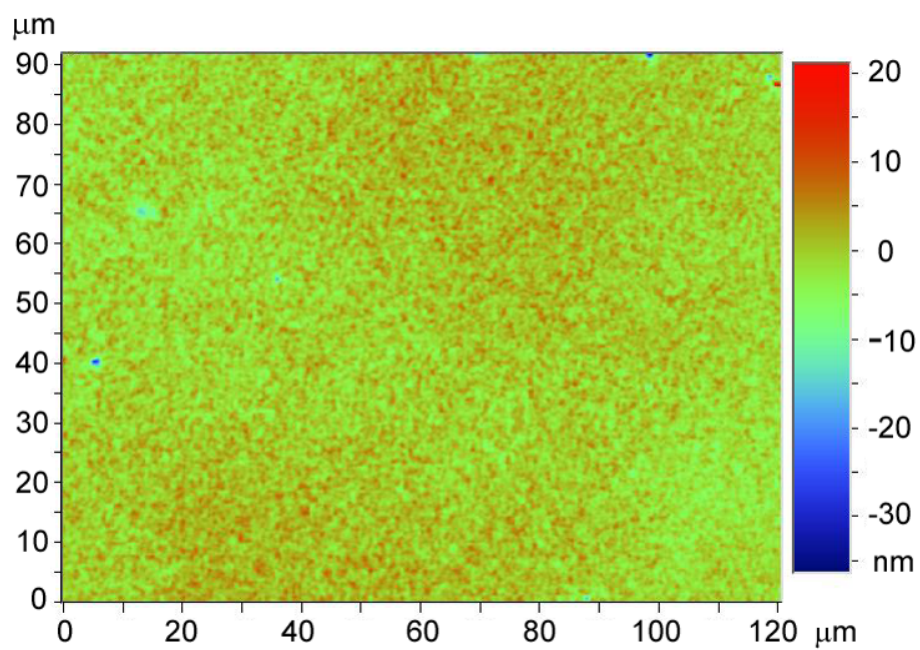

**Figure S5.** A representative interferometry scan on a large area ( $121 \times 92 \mu\text{m}$ ) of the  $\text{Cu}_3(\text{btc})_2@\text{SiO}_2$  coating obtained after 20 cycles of  $\text{Cu}_2(\text{OAc})_4 + \text{H}_3\text{btc}$  step-by-step deposition.
